# Supplementary material
Source: MDPI journal article supplement (https://www.mdpi.com/2413-8851/2/3/89)
Supplement: s1 [file s1]

## SAMPLE CITIES AND ZONING CODES

1. Apple Valley [1]
2. Artesia [2]
3. Azusa [3–5]
4. Beverly Hills [6]
5. Brentwood [7]
6. Burlingame [8, 9]
7. Campbell [10]
8. Cerritos [11]
9. Chula Vista [12]
10. Cupertino [13]
11. Davis [14–16]
12. Folsom [17–19]
13. Fontana [20]
14. Foster City [21]
15. Fountain Valley [22]
16. Galt [23–25]
17. Hesperia [26]
18. La Canada Flintridge [27,28]
19. La Palma [29,30]
20. Lafayette [31]
21. Laguna Hills [32]
22. Lake Elsinore [33,34]
23. Lemon Grove [35]
24. Los Gatos [36]
25. Manhattan Beach [37]

26. Mill Valley [38]
27. Millbrae [39,40]
28. Moraga [41]
29. Mountain View [42]
30. Newark [43]
31. Ojai [44]
32. Pacifica [45]
33. Palo Alto [46]
34. Perris [47]
35. Placerville [48–50]
36. Pleasant Hill [51]
37. Pleasanton [52]
38. Port Hueneme [53]
39. Poway [54]
40. Redondo Beach [55]
41. Richmond [56]
42. Rolling Hills Estates [57]
43. Ross [58]
44. San Anselmo [59]
45. San Carlos [60]
46. San Gabriel [61,62]
47. San Marcos [63]
48. San Pablo [64]
49. San Ramon [65]
50. Santa Clara [66]
51. Santa Paula [67]
52. Simi Valley [68]

- 53. Solana Beach [69]
- 54. Tiburon [70]
- 55. Villa Park [71]
- 56. West Hollywood [72]
- 57. Yorba Linda [73]

## OTHER DATA

- 58. National Center for Education Statistics [74],
- 59. California Community Colleges Chancellor's Office [75]
- 60. Association of Bay Area Governments [76,77]
- 61. Sacramento Area Council of Governments [78,79]
- 62. Southern California Association of Governments [80,81]
- 63. San Diego Association of Governments [82,83]
- 64. California Department of Finance [84,85]
- 65. California Department of Housing and Community Development [86,87]
- 66. U.S. Department of Census [88–93]

**Table S1.** The 2008-2013 Regional Housing Needs Allocation for the City of Galt, CA as devised by SACOG

| Income Category | Allocated Housing Needs | Income Limit: 2 persons | Income Limit: 4 persons |
|-----------------|-------------------------|-------------------------|-------------------------|
| Very-Low        | 137                     | 29,250                  | 36,550                  |
| Low             | 66                      | 46,800                  | 58,500                  |
| Moderate        | 93                      | 70,150                  | 87,800                  |
| Above-Moderate  | 339                     | n/a                     | n/a                     |
| Total           | 635                     |                         |                         |

The categories of very-low, low, and moderate are considered low-income housing. The above moderate has no income limit and is considered market-rate housing. The 2010 Income Limits are determined by CAHCD per annum. Sources: [23,94].

**Table S2.** The twelve excluded cities from the sampling frame and ranked by their Year 2000 Population. Sources: [88]

| Rank | City          | County        | City Status | Population |
|------|---------------|---------------|-------------|------------|
| 1    | Los Angeles   | Los Angeles   | Chartered   | 3,694,834  |
| 2    | San Diego     | San Diego     | Chartered   | 1,223,341  |
| 3    | San Jose      | Santa Clara   | Chartered   | 893,889    |
| 4    | San Francisco | San Francisco | Chartered   | 776,733    |
| 5    | Long Beach    | Los Angeles   | Chartered   | 461,381    |
| 6    | Sacramento    | Sacramento    | Chartered   | 407,075    |
| 7    | Oakland       | Alameda       | Chartered   | 399,477    |
| 8    | Santa Ana     | Orange        | Chartered   | 337,512    |
| 9    | Anaheim       | Orange        | Chartered   | 327,357    |
| 10   | Riverside     | Riverside     | Chartered   | 255,093    |
| 11   | Fremont       | Alameda       | General Law | 203,413    |
| 12   | Glendale      | Los Angeles   | Chartered   | 195,047    |

**Table S3.** The Multiyear Fair-Share Housing Allocations for the Regions. This allocation covers the period of study (2007–2014). Sources: [77,78,80,83].

| Region (COG)            | Low-income<br>Housing<br>Needs | Market-Rate<br>Housing<br>Needs | Total Housing<br>Needs | Low-Income % | Market-Rate % |
|-------------------------|--------------------------------|---------------------------------|------------------------|--------------|---------------|
| Los Angeles<br>(SCAG)   | 307,910                        | 223,589                         | 531,499                | 57.9%        | 42.1%         |
| Sacramento<br>(SACOG)   | 41,532                         | 28,939                          | 70,471                 | 58.9%        | 41.1%         |
| San Diego<br>(SANDAG)   | 56,075                         | 38,864                          | 94,939                 | 59.1%        | 40.9%         |
| San Francisco<br>(ABAG) | 118,533                        | 84,790                          | 203,323                | 58.3%        | 41.7%         |
| Total                   | 524,050                        | 376,182                         | 900,232                | 58.2%        | 41.8%         |

**Table S4.** The Efficacy of Each City's Housing Needs Allocation.

|    | City Name      | MHI    | Allocated LIH | Allocated MR | LIH Constructed | MR Constructed | LIH Efficacy | MR Efficacy | Overall Efficacy |
|----|----------------|--------|---------------|--------------|-----------------|----------------|--------------|-------------|------------------|
| 1  | Perris*        | 35,494 | 2,384         | 1,778        | 146             | 2,334          | 6.1%         | 131.3%      | 59.6%            |
| 2  | Placerville*   | 36,444 | 181           | 207          | -               | 73             | 0.0%         | 35.3%       | 18.8%            |
| 3  | San Pablo      | 37,266 | 120           | 178          | -               | 42             | 0.0%         | 23.6%       | 14.1%            |
| 4  | West Hollywood | 38,902 | 332           | 252          | 142             | 377            | 42.8%        | 149.6%      | 88.9%            |
| 5  | Azusa          | 39,250 | 423           | 323          | 3               | 713            | 0.7%         | 220.7%      | 96.0%            |
| 6  | Lemon Grove    | 39,886 | 124           | 118          | 81              | -              | 65.3%        | 0.0%        | 33.5%            |
| 7  | Hesperia       | 40,193 | 5,311         | 3,784        | 538             | 1,024          | 10.1%        | 27.1%       | 17.2%            |
| 8  | Apple Valley   | 40,442 | 2,275         | 1,611        | -               | 612            | 0.0%         | 38.0%       | 15.7%            |
| 9  | Santa Paula*   | 41,622 | 1,305         | 936          | 176             | 275            | 13.5%        | 29.4%       | 20.1%            |
| 10 | San Gabriel*   | 41,810 | 473           | 354          | 27              | 90             | 5.7%         | 25.4%       | 14.1%            |
| 11 | Lake Elsinore  | 41,898 | 3,273         | 2,316        | 111             | 2,932          | 3.4%         | 126.6%      | 54.4%            |
| 12 | Port Hueneme*  | 42,275 | 104           | 76           | 75              | 109            | 72.1%        | 143.4%      | 102.2%           |
| 13 | Davis          | 42,473 | 313           | 185          | 371             | 358            | 118.5%       | 193.5%      | 146.4%           |
| 14 | Richmond       | 44,208 | 1,270         | 1,556        | 492             | 631            | 38.7%        | 40.6%       | 39.7%            |
| 15 | Ojai           | 44,569 | 75            | 56           | 21              | 12             | 28.0%        | 21.4%       | 25.2%            |
| 16 | Artesia        | 44,844 | 254           | 179          | -               | 39             | 0.0%         | 21.8%       | 9.0%             |
| 17 | Chula Vista    | 44,867 | 10,075        | 7,148        | 863             | 4,207          | 8.6%         | 58.9%       | 29.4%            |
| 18 | Galt           | 45,058 | 296           | 339          | 163             | 347            | 55.1%        | 102.4%      | 80.3%            |

|    | City Name       | MHI    | Allocated<br>LIH | Allocated<br>MR | LIH<br>Constructed | MR<br>Constructed | LIH<br>Efficacy | MR<br>Efficacy | Overall<br>Efficacy |
|----|-----------------|--------|------------------|-----------------|--------------------|-------------------|-----------------|----------------|---------------------|
| 19 | Fontana         | 45,761 | 3,370            | 2,329           | 1,504              | 1,904             | 44.6%           | 81.8%          | 59.8%               |
| 20 | San Marcos      | 45,900 | 3,658            | 2,595           | 1,424              | 1,683             | 38.9%           | 64.9%          | 49.7%               |
| 21 | Campbell        | 67,182 | 479              | 413             | 399                | 149               | 83.3%           | 36.1%          | 61.4%               |
| 22 | Pleasant Hill** | 67,464 | 371              | 257             | -                  | 108               | 0.0%            | 42.0%          | 17.2%               |
| 23 | Millbrae        | 68,295 | 264              | 188             | 21                 | 407               | 8.0%            | 216.5%         | 94.7%               |
| 24 | Burlingame      | 68,510 | 10               | 6               | -                  | 77                | 0.0%            | 1283.3%        | 481.3%              |
| 25 | La Palma        | 68,542 | 380              | 270             | 6                  | 12                | 1.6%            | 4.4%           | 2.8%                |
| 26 | Redondo Beach   | 69,154 | 1,330            | 904             | 32                 | 789               | 2.4%            | 87.3%          | 36.8%               |
| 27 | Brentwood       | 69,167 | 1,632            | 1,073           | 601                | 1,009             | 36.8%           | 94.0%          | 59.5%               |
| 28 | Mountain View*  | 69,337 | 572              | 291             | 231                | 1,206             | 40.4%           | 414.4%         | 166.5%              |
| 29 | Newark**        | 69,361 | 1,447            | 1,152           |                    | 10                | 0.0%            | 0.9%           | 0.4%                |
| 30 | Santa Clara     | 69,448 | 3,209            | 2,664           | 484                | 28,514            | 15.1%           | 1070.3%        | 493.8%              |
| 31 | Fountain Valley | 69,789 | 278              | 189             | -                  | 365               | 0.0%            | 193.1%         | 78.2%               |
| 32 | Laguna Hills**  | 70,188 | 5                | 3               | -                  | (85)              | 0.0%            | -2833.3%       | -1062.5%            |
| 33 | Simi Valley     | 70,370 | 2,053            | 1,330           | 185                | 666               | 9.0%            | 50.1%          | 25.2%               |
| 34 | Beverly Hills   | 70,932 | 259              | 178             | 19                 | 269               | 7.3%            | 151.1%         | 65.9%               |
| 35 | San Anselmo***  | 71,600 | 66               | 47              | -                  | 48                | 0.0%            | 102.1%         | 42.5%               |
| 36 | Poway           | 71,673 | 736              | 505             | 301                | 292               | 40.9%           | 57.8%          | 47.8%               |
| 37 | Pacifica        | 71,820 | 161              | 114             | 91                 | 171               | 56.5%           | 150.0%         | 95.3%               |

|    | City Name             | MHI     | Allocated<br>LIH | Allocated<br>MR | LIH<br>Constructed | MR<br>Constructed | LIH<br>Efficacy | MR<br>Efficacy | Overall<br>Efficacy |
|----|-----------------------|---------|------------------|-----------------|--------------------|-------------------|-----------------|----------------|---------------------|
| 38 | Solana Beach*         | 71,974  | 77               | 53              | 9                  | 9                 | 11.7%           | 17.0%          | 13.8%               |
| 39 | Cerritos*             | 73,000  | 56               | 38              | -                  | 17                | 0.0%            | 44.7%          | 18.1%               |
| 40 | Folsom                | 73,133  | 2,649            | 952             | 675                | 883               | 25.5%           | 92.8%          | 43.3%               |
| 41 | San Carlos**          | 88,349  | 351              | 248             | -                  | 106               | 0.0%            | 42.7%          | 17.7%               |
| 42 | Yorba Linda           | 89,623  | 1,243            | 796             | 150                | 1,210             | 12.1%           | 152.0%         | 66.7%               |
| 43 | Palo Alto             | 90,393  | 1,874            | 986             | 290                | 773               | 15.5%           | 78.4%          | 37.2%               |
| 44 | Pleasanton            | 90,827  | 196              | 96              | 173                | 852               | 88.3%           | 887.5%         | 351.0%              |
| 45 | Mill Valley           | 90,921  | 2,524            | 753             | 95                 | 49                | 3.8%            | 6.5%           | 4.4%                |
| 46 | Los Gatos             | 94,259  | 376              | 186             | 48                 | 180               | 12.8%           | 96.8%          | 40.6%               |
| 47 | Foster City           | 95,223  | 285              | 201             | 66                 | 247               | 23.2%           | 122.9%         | 64.4%               |
| 48 | San Ramon*            | 95,888  | 2,629            | 834             | 2,352              | 1,121             | 89.5%           | 134.4%         | 100.3%              |
| 49 | Moraga                | 97,843  | 172              | 62              | -                  | 10                | 0.0%            | 16.1%          | 4.3%                |
| 50 | Cupertino             | 100,414 | 813              | 357             | 75                 | 587               | 9.2%            | 164.4%         | 56.6%               |
| 51 | Manhattan Beach       | 100,762 | 545              | 350             | -                  | 375               | 0.0%            | 107.1%         | 41.9%               |
| 52 | Ross                  | 102,015 | 19               | 8               | 7                  | 1                 | 36.8%           | 12.5%          | 29.6%               |
| 53 | Lafayette             | 102,079 | 270              | 91              | 63                 | 170               | 23.3%           | 186.8%         | 64.5%               |
| 54 | Tiburon*              | 106,564 | 84               | 33              | -                  | 16                | 0.0%            | 48.5%          | 13.7%               |
| 55 | Rolling Hills Estates | 109,531 | 16               | 10              | 6                  | 61                | 37.5%           | 610.0%         | 257.7%              |
| 56 | La Canada Flintridge  | 109,874 | 143              | 92              | -                  | 4                 | 0.0%            | 4.3%           | 1.7%                |

|    | City Name    | MHI     | Allocated LIH | Allocated MR | LIH Constructed | MR Constructed | LIH Efficacy | MR Efficacy | Overall Efficacy |
|----|--------------|---------|---------------|--------------|-----------------|----------------|--------------|-------------|------------------|
| 57 | Villa Park** | 116,547 | 7             | 4            | -               | 4              | 0.0%         | 100.0%      | 36.4%            |

The cities are ranked by MHI. For cities with an asterisk (\*, \*\*, \*\*\*), their housing data was supplemented with California Department of Finance data [84, 85]. In this analysis, the totals for LIH and MR were taken from each city's 2015-2023 housing plan. However, many plans did not indicate MR production. In those cases, the following process was undertaken. First, the city's CADOF Total Housing Estimate for 2015 was subtracted from the cities Total Housing Estimate for 2007, creating a MR total. Second, if the city's housing plan indicated LIH, then those units were subtracted from the cities MR total.

For example, the City of Perris' 2015-2023 housing plan indicated that 146 LIH units were produced from 2007-2014. CADOF indicated that Perris had 18,536 total housing units as of 1/1/2015 and 16,056 total housing units as of 1/1/2007. The calculation was  $18,536 - 16,056 - 146 = 2,334$  MR units for 2007-2014, leading to a 6% LIH efficacy, a 131.3% MR efficacy, and a 59.6% overall efficacy.

Notes: CADOF = California Department of Finance, LIH = Low-Income Housing, MHI = Median Household Income, MRH = Market-Rate Housing, \* Housing Plan provided no data regarding overall housing production. \*\* Housing Plan provided no data regarding low-income or overall housing production. \*\*\* Housing Plan provided data regarding approved but not completed units.

**Table S5.** The Negative Binomial Regression Model.

| Variable                | Model 7               | Model 7 Expected Counts of<br>ADU Production |                         |                   |
|-------------------------|-----------------------|----------------------------------------------|-------------------------|-------------------|
|                         | B (SE)<br>Estimate    | Variable<br>= Min                            | Variable<br>= $\bar{x}$ | Variable<br>= Max |
| (Intercept)             | -2.005<br>(1.5689)    |                                              |                         |                   |
| College                 | 0.973°<br>(0.505)     |                                              |                         |                   |
| Compliance              | -1.839*<br>(0.868)    |                                              |                         |                   |
| Density                 | -0.0009**<br>(0.0003) |                                              |                         |                   |
| Development Constraints | -0.714<br>(0.725)     |                                              |                         |                   |
| Income                  | 0.033*<br>(0.013)     |                                              |                         |                   |
| Renters                 | 10.808***<br>(2.731)  | 0.32                                         | 7.69                    | 108.38            |
| Senior Citizens         | 5.774<br>(6.578)      |                                              |                         |                   |
| Observations            | 56                    |                                              |                         |                   |
| Log Likelihood          | -337.677              |                                              |                         |                   |
| AIC                     | 355.68                |                                              |                         |                   |
| Model $\chi^2(7)$       | 26.31***              |                                              |                         |                   |
| Response Variable       | ADU<br>Production     |                                              |                         |                   |

Model 7 excludes the City of West Hollywood due to the city's outlier renter value of .78. In this reduced model, *College* becomes marginally significant and the expected counts of *Renters* is transformed to roughly 8 ADUs when a city's proportion of renters close to the reduced sample mean ( $\bar{x}$ = 0.341). Notes: ADU = Accessory Dwelling Unit, SE = Standard Error; ° =  $p < 0.1$ , \* =  $p < 0.05$ , \*\* =  $p < 0.01$ , \*\*\* =  $p < 0.001$ .

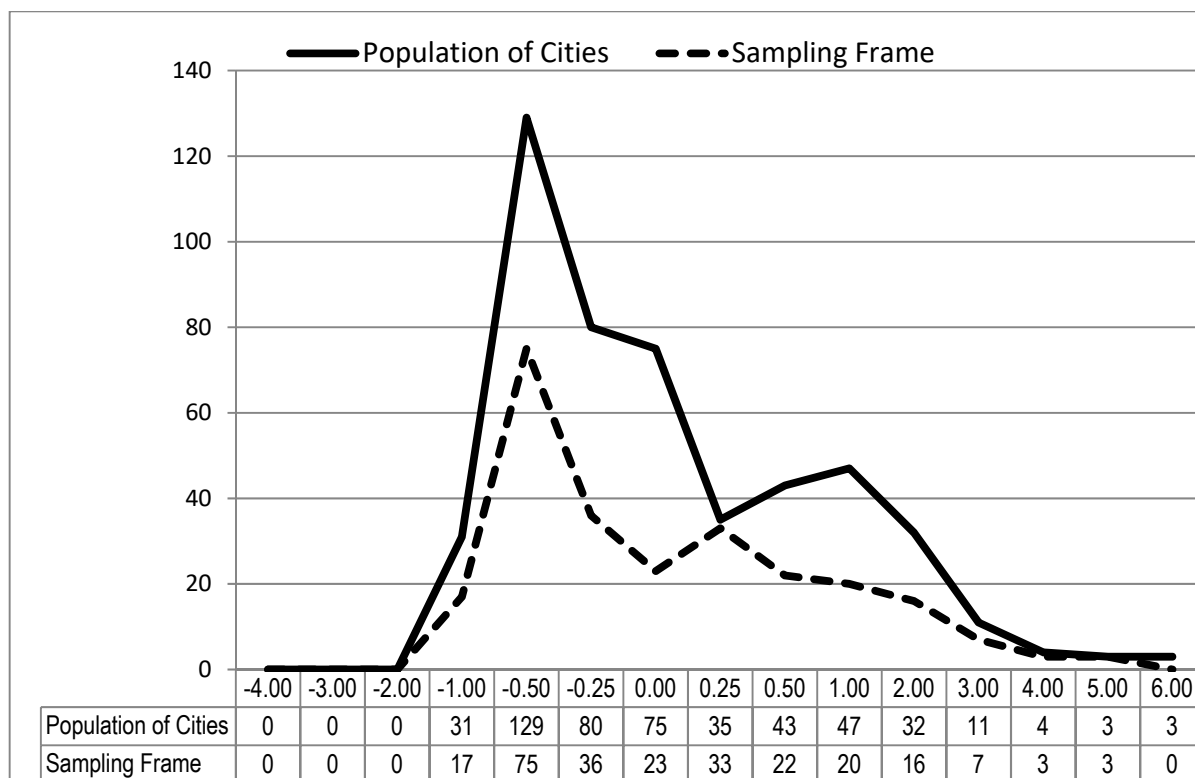

**Figure S1.** Distribution of Year 2000 Median Household Income for CA Cities (standardized).

Population (n=494) represents all California cities. Sampling Frame (n=255) is the list from which the sample was drawn. Source: [88]

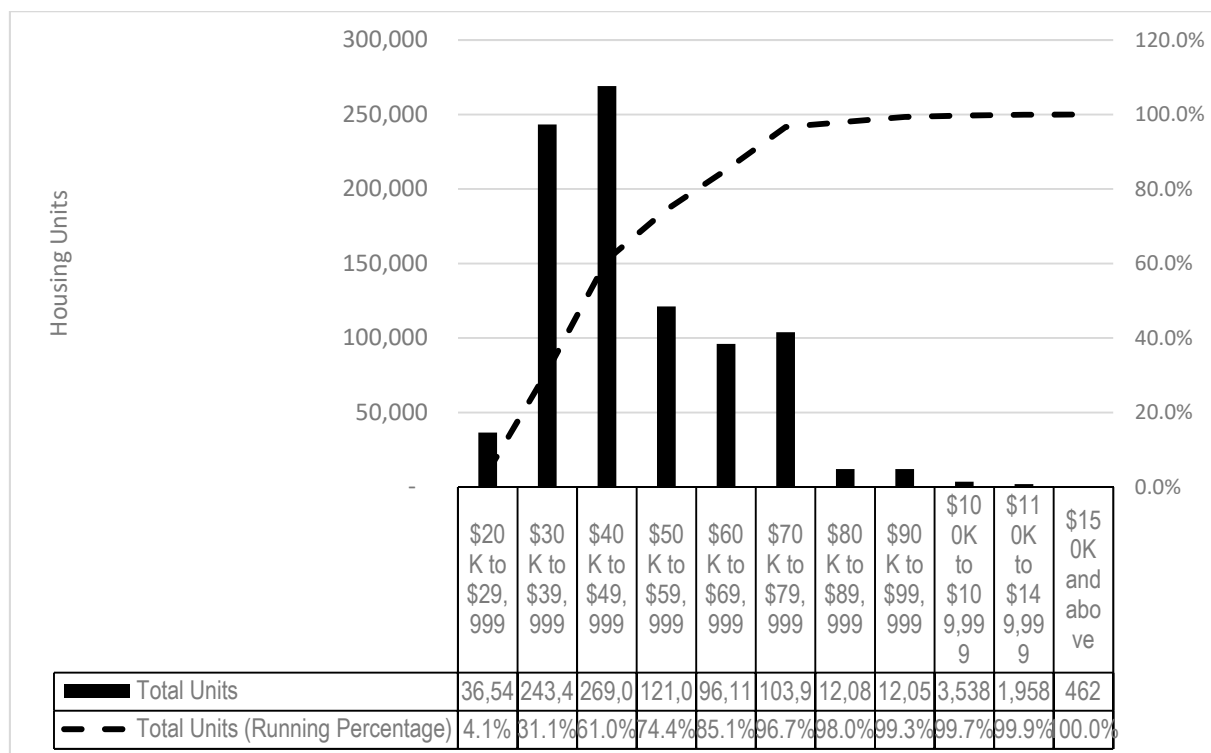

**Figure S2.** Distribution of the collective fair-share housing allocation for the urban regions (2007-2014) and categorized by each city's year 2000 median household income (MHI).

The COGs and cities employed year 2000 census data when calculating and accommodating housing needs. The chart illustrates that cities with MHIs between \$20-29,999 received 4.1% (or 36,548) of allocated housing needs. Collectively, cities with MHIs between \$20-49,999 received 61% (or 269,031) of allocated housing needs. Sources: [77, 78, 80, 83, 88]

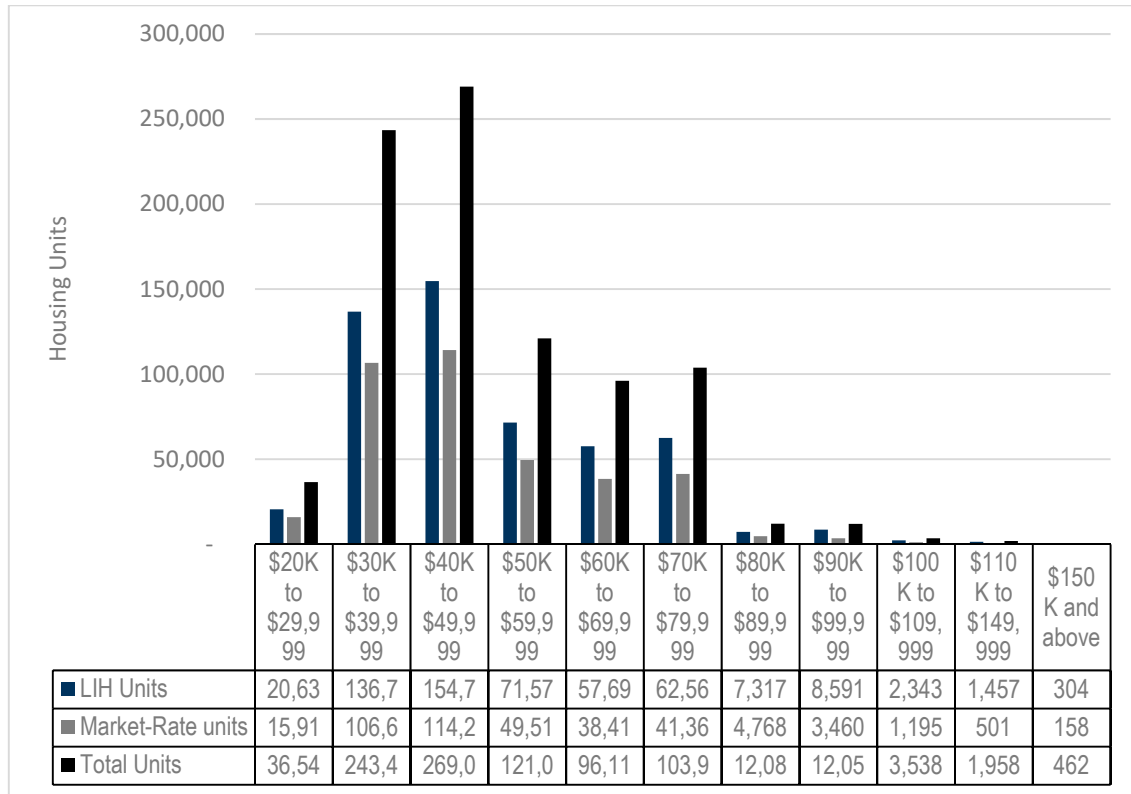

**Figure S3.** Distribution of the collective fair-share housing allocation for the urban regions (2007–2014), categorized by each city’s year 2000 median household income (MHI) and separated by low-income and market-rate categories.

The COGs and cities employed year 2000 census data when calculating and accommodating housing needs. The chart illustrates that cities with MHIs between \$20–29,999 received 36,548 (or 4.1%) of allocated housing needs. Collectively, cities with MHIs between \$20–49,999 received 269,031 (or 61%) of allocated housing needs. Sources: [77, 78, 80, 83, 88]

## References

1. Municipal Code: Chapter 9.29.120 - Second Dwelling Units. n.d., Town of Apple Valley: Apple Valley, CA, USA.
2. Municipal Code: Chapter 9-2.2803(f) Second Dwelling Units. n.d., City of Artesia: Artesia, CA, USA.
3. City of Azusa 2000-2005 Housing Element, Final. 2001: Azusa, CA, USA. p. 68.
4. Municipal Code: Chapter 88.42.190. - Second Units and Carriage Houses. n.d., City of Azusa: Azusa, CA, USA.
5. Cotton Bridges & Associates, City of Azusa 2008-2014 Housing Element. 2010: Azusa, CA, USA. p. 136.
6. Municipal Code: Chapter 10-3-409: SECOND UNITS. n.d., City of Beverly Hills: Beverly Hills, CA, USA.
7. Municipal Code: Chapter 17.100.005 Secondary housing units. n.d., City of Brentwood: Brentwood, CA, USA.
8. Municipal Code: Chapter 25.59 SECONDARY DWELLING UNITS. n.d., City of Burlingame: Burlingame, CA, USA.
9. City of Burlingame, 2009 - 2014 Housing Element. 2010: Burlingame, CA, USA.
10. Municipal Code: Chapter 21.36.200 - Secondary dwelling units. n.d., City of Campbell: Campbell, CA, USA.
11. Municipal Code: Chapter 22.40.210(3) Second Dwelling Units or Second Units. n.d., City of Cerritos: Cerritos, CA, USA.
12. Municipal Code: Chapter 19.58.022 Accessory second dwelling units. n.d., City of Chula Vista: Chula Vista, CA, USA.
13. Municipal Code: Chapter 19.112 SECOND DWELLING UNITS IN R-1, RHS, A AND A-1 ZONES. n.d., City of Cupertino: Cupertino, CA, USA.
14. City of Davis 2002 Housing Element. 2004: Davis, CA, USA.
15. Municipal Code: Chapter 19.60.160 - Second dwelling units. n.d., City of Davis: Davis, CA, USA.
16. PMC Consultants, City of Davis Adopted Housing Element. 2010: Davis, CA, USA.
17. Municipal Code: Chapter 17.105 Second Dwelling Units. n.d., City of Folsom: Folsom, CA, USA.
18. Mintier & Associates, City of Folsom, Housing Element Background Report. 2002: Folsom, CA, USA.
19. Mintier Harnish, City of Folsom, Housing Element Background Report, final draft. 2009: Folsom, CA, USA.
20. Municipal Code: Chapter Sec. 30-179 - Second dwelling units. n.d., City of Fontana: Fontana, CA, USA.
21. Municipal Code: Chapter 17.78 SECONDARY RESIDENTIAL UNIT REGULATIONS. n.d., Foster City: Foster City, CA, USA.
22. Municipal Code: 21.08.050 (d) Secondary Dwelling Units. n.d., City of Fountain Valley: Fountain Valley, CA, USA.
23. City of Galt, Housing Element 2008-2013. 2013: Galt, CA, USA.
24. Municipal Code: Chapter 18.44.150 Second residential unit standards. n.d., City of Galt: Galt, CA, USA.
25. Campion, C., City of Galt Annual 2030 Galt General Plan and Housing Element Progress Report: 2010. 2011, Community Development Department, Galt, CA, USA.
26. Municipal Code: Chapter 16.12.360 - Second dwelling units. n.d., City of Hesperia: Hesperia, CA, USA.
27. City of La Cañada Flintridge 2008-2014 Housing Element. 2009: La Canada, CA, USA. p. 93.
28. Municipal Code: Chapter 11.33 ACCESSORY LIVING QUARTERS. n.d., City of La Canada: La Canada Flintridge, CA.
29. Municipal Code: Chapter 44-111 - Second unit residences. n.d., City of La Palma: La Palma, CA, USA.
30. City of La Palma, Expanded Housing Element. 2010: La Palma, CA, USA.
31. Municipal Code: Chapter 6-560. n.d., City of Lafayette: Lafayette, CA, USA.
32. Municipal Code: Chapter 9-68 ACCESSORY LIVING QUARTERS/SECOND UNIT HOUSING. n.d., City of Laguna Hills: Laguna Hills, CA, USA.
33. Municipal Code: Chapter 17.56 SECOND UNITS. n.d., City of Lake Elsinore: Lake Elsinore, CA, USA.
34. Hogle-Ireland, I., City of Lake Elsinore Housing Element. 2011: Lake Elsinore, CA, USA.
35. Municipal Code: Chapter 17.24.060.D.1 Accessory Rental Dwelling. n.d., City of Lemon Grove: Lemon Grove, CA, USA.
36. Town Code: Divison 7, Chapter 29.10.305-335. n.d., Town of Los Gatos: Los Gatos, CA, USA.
37. Ordinance No. 1689, in City of Manhattan Beach Code of Ordinances. 1985, Manhattan Beach, CA - City Clerk, USA.
38. Municipal Code: Chapter 20.90 RESIDENTIAL SECOND UNITS. n.d., City of Mill Valley: Mill Valley, CA, USA.

39. Ordinance No. 489, in City of Millbrae Code of Ordinances. 1984, Millbrae, CA - City Clerk, USA.
40. An Ordinance of the City of Millbrae Precluding Secondary Dwelling Units (No. 489), City of Millbrae, Editor. 2005: Millbrae, CA, USA.
41. Municipal Code: Chapter 8.124 - SECONDARY LIVING UNIT. n.d., Town of Moraga: Moraga, CA, USA.
42. Municipal Code: Chapter 36.12.60. - Companion units. n.d., City of Mountain View: Mountain View, CA, USA.
43. Municipal Code: Chapter 17.08.415. n.d., City of Newark: Newark, CA, USA.
44. Municipal Code: Chapter 10-2.1709 Second residential units. n.d., City of Ojai: Ojai, CA, USA.
45. Municipal Code: Chapter 9-4.451. n.d., City of Pacifica: Pacifica, CA, USA.
46. Municipal Code: Chapters 18.10.070 and 18.12.070 - Second Dwelling Units. n.d., City of Palo Alto: Palo Alto, CA, USA.
47. Municipal Code: Chapter 19.81 SECOND DWELLING UNITS. n.d., City of Perris: Perris, CA, USA.
48. City of Placerville Housing Element 2008-2013, draft. 2010: Placerville, CA, USA.
49. Municipal Code: Chapter 10-4-12 SECONDARY DWELLING UNITS. n.d., City of Placerville: Placerville, CA, USA.
50. Cotton Bridges & Associates, City of Placerville Housing Element 2003-2009. 2004: Placerville, CA, USA.
51. Municipal Code: Chapter 18.20.100 Secondary dwelling units. n.d., City of Pleasant Hill: Pleasant Hill, CA, USA.
52. Municipal Code: Chapter 18.106 SECOND UNITS. n.d., City of Pleasanton: Pleasanton, CA, USA.
53. Municipal Code: Division 10 Chapter 6 Affordable Housing, City of Port Hueneme, Editor. n.d.: Port Hueneme, CA, USA.
54. Municipal Code: 17.08.180 Accessory buildings and structures. n.d., City of Poway: Poway, CA, USA.
55. Municipal Code: Chapter 10-2.1506 Second units in single-family and multi-family residential zones. n.d., City of Redondo Beach: Redondo Beach, CA, USA.
56. Municipal Code: Chapter 15.04.810.020 Second Dwelling Units, City of Richmond, Editor. n.d.: Richmond, CA, USA.
57. Municipal Code: Chapter 17.56 - SECOND DWELLING UNITS. n.d., City of Rolling Hills Estates: Rolling Hills Estates, CA, USA.
58. Town Code: Chapter 18.42 RESIDENTIAL SECOND UNITS. n.d., Town of Ross: Ross, CA, USA.
59. Town Code: Title 10 Chapter 6. n.d., Town of San Anselmo: San Anselmo, CA, USA.
60. Municipal Code: Chapter 18.23.210 Second dwelling units. n.d., City of San Carlos: San Carlos, CA, USA.
61. Municipal Code: Chapter 153.047 SECOND RESIDENTIAL UNITS. n.d., City of San Gabriel: San Gabriel, CA, USA.
62. Conexus, City of San Gabriel 2008-2014 Housing Element. 2010: San Gabriel, CA, USA. p. 119.
63. Municipal Code: Chapter 20.410 Second Dwelling Units and Accessory Structures. n.d., City of San Marcos: San Marcos, CA, USA.
64. Municipal Code: Chapter 17.10.080 Secondary residential units. n.d., City of San Pablo: San Pablo, CA, USA.
65. Municipal Code: Division 3 Chapter 4-39 - Second Dwelling Units. n.d., City of San Ramon: San Ramon, CA, USA.
66. Municipal Code: Chapter 18.12.030(d). n.d., City of Santa Clara: Santa Clara, CA, USA.
67. Municipal Code: Chapter 16.227 of Title 16. n.d., City of Santa Paula: Santa Paula, CA, USA.
68. Municipal Code: Chapter 9-44.160 - Second Dwelling Units (Ministerial). n.d., City of Simi Valley: Simi Valley, CA, USA.
69. Municipal Code: Chapter 17.20.040.D Accessory Living Units. n.d., City of Solana Beach: Solana Beach, CA, USA.
70. Municipal Code: Chapter 16-52.100 - Secondary dwelling unit. n.d., Town of Tiburon: Tiburon, CA, USA.
71. Municipal Code: Chapter 23-22 - SECOND DWELLING UNITS. n.d., City of Villa Park: Villa Park, CA, USA.
72. Municipal Code: Chapter 19.36.310 Residential Uses - Second Residential Units. n.d., City of West Hollywood: West Hollywood, CA, USA.
73. Municipal Code: Chapter 18.20.800 Second Units. n.d., City of Yorba Linda: Yorba Linda, CA, USA.
74. College Navigator. n.d.: National Center for Education Statistics, U.S. Department of Education Institute of Education Sciences.
75. Alphabetic Listing of Community Colleges, California Community Colleges Chancellor's Office, Editor. n.d.: Sacramento, CA, USA.

76. Association of Bay Area Governments. n.d. Available online: <http://abag.ca.gov/overview/whowhat.html> (accessed on 15 July 2016).
77. San Francisco Bay Area Housing Needs Plan (2007-2014), Association of Bay Area Governments, Editor. 2008: San Francisco, CA, USA.
78. Table 2 - Housing Unit Allocations by Income Category (2006-2013), Sacramento Area Council of Governments, Editor. 2007: Sacramento, CA, USA.
79. Sacramento Area Council of Governments. n.d. Available online: <http://www.sacog.org/about-sacog> (accessed on 7 June 2016).
80. Final Regional Housing Need Allocation Plan - Planning Period (January 1, 2006 – June 30, 2014), Southern California Association of Governments, Editor. 2005: Los Angeles, CA, USA.
81. Southern California Association of Governments. n.d. Available online: <http://www.scag.ca.gov/about/Pages/Home.aspx> (accessed on 6 June 2016).
82. San Diego Association of Governments. n.d. Available online: <http://www.sandag.org/index.aspx?fuseaction=about.home> (accessed on 15 July 2016).
83. Final Regional Housing Needs Assessment for the 2005-2010 Housing Element cycle, San Diego Association of Governments, Editor. 2005: San Diego, CA, USA.
84. E-8 Historical Population and Housing Estimates for Cities, Counties, and the State, 2000-2010, State of California and Department of Finance, Editors. 2012: Sacramento, CA, USA.
85. E-5 Population and Housing Estimates for Cities, Counties, and the State, January 1, 2011-2018, with 2010 Benchmark, State of California and Department of Finance, Editors. 2018: Sacramento, CA, USA.
86. California Department of Housing and Community Development. Housing Element Status Reports. n.d. Available online: <http://www.hcd.ca.gov/community-development/housing-element/index.shtml>. (accessed on 15 October 2015).
87. State of California and Department of Housing and Community Development, Housing Element Status Reports. 1990-2007: Sacramento, CA, USA.
88. American Factfinder, U.S. Census Bureau, Editor. 2000: Washington DC, USA.
89. Census 1980, U.S. Census Bureau and Social Explorer, Editors. n.d.: Washington, DC, USA.
90. Census 1970, U.S. Census Bureau and Social Explorer, Editors. n.d.: Washington DC, USA.
91. Median Values, U.S. Census Bureau, Editor. 2010: Washington DC, USA.
92. Median Household Income, U.S. Census Bureau, Editor. 2010: Washington DC, USA.
93. American Factfinder, U.S. Census Bureau, Editor. 2010: Washington DC, USA.
94. Creswell, C.E., Official State Income Limits for 2010, California Department of Housing and Community Development, Editor. 2010: Sacramento, CA, USA.
